# Supplementary material
Source: publisher figshare collection journal article supplement (https://frontiersin.figshare.com/ndownloader/files/13784015)
Supplement: Supplementary file [file 13784015]

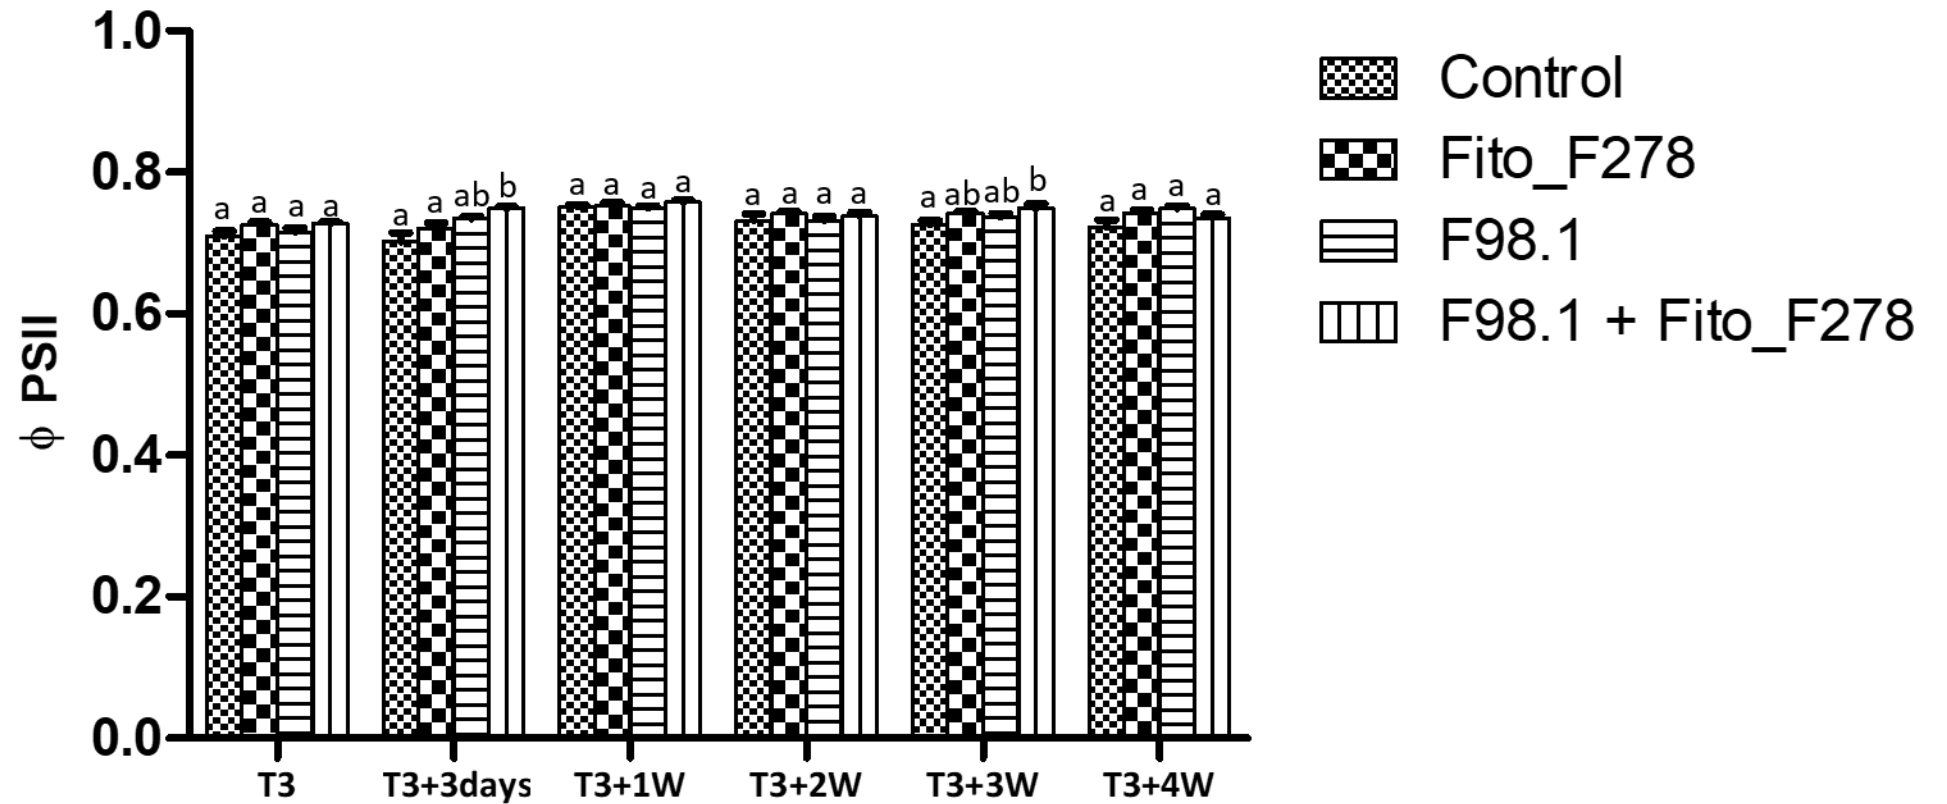

**Figure S6: Changes in relative quantum yield of photosystem II ( $\phi$ PSII) overtime.** Results of 11 (T3; T3+3 days; T3+1 week) and 7 replicates (T3+2 weeks; T3+3 weeks; T3+4 weeks) were assessed for each condition and the experiment was carried out twice. The pooled mean and standard error values of replicates from the two experiments are presented for each condition and time point. Differences between conditions within each time point were compared to determine their significance. Letters indicate significant differences according to the Kruskal-Wallis test, followed by a Mann-Whitney U test ( $p \leq 0.05$ ).
